# Supplementary material for: DNA methylation changes and somatic mutations as tumorigenic events in Lynch syndrome-associated adenomas retaining mismatch repair protein expression
Source: PubMed Central journal article supplement — eBioMedicine. 2018 Dec 18;39:280–91. doi: 10.1016/j.ebiom.2018.12.018 (PMC6355728; doi:10.1016/j.ebiom.2018.12.018), 2018-12-18
Supplement: mmc1.pdf [file mmc1.pdf]

**Supplementary Table S1.** Germline mutation details for the 57 patients whose archival tumorous tissue specimens were included in this study.

| Gene        | Transcript  | HGVS Mutation                        | HGVS Protein         | No. of individuals with mutation |
|-------------|-------------|--------------------------------------|----------------------|----------------------------------|
| <i>MLH1</i> | NM_000249.3 | c.1731+2247_1897-402del (Mutation 1) | p.Pro579_Glu633del   | 28                               |
| <i>MLH1</i> | NM_000249.3 | c.454-1G>A (Mutation 2)              | p.Glu153Phefs*8      | 7                                |
| <i>MLH1</i> | NM_000249.3 | c.1975C>T                            | p.Arg659*            | 2                                |
| <i>MLH1</i> | NM_000249.3 | c.(207+1_208-1)_(453+1_454-1)del     | p.Lys70_Thr151del    | 1                                |
| <i>MLH1</i> | NM_000249.3 | c.1039-1G>A                          | p.(Thr347Lysfs*8)    | 1                                |
| <i>MLH1</i> | NM_000249.3 | c.298C>T                             | p.(Arg100*)          | 1                                |
| <i>MLH1</i> | NM_000249.3 | c.307-?_545+?del                     | p.(Ala103Valfs*9)    | 1                                |
| <i>MLH1</i> | NM_000249.3 | c.320T>G                             | p.Ile107Arg          | 1                                |
| <i>MLH1</i> | NM_000249.3 | c.543C>G                             | p.?                  | 1                                |
| <i>MLH1</i> | NM_000249.3 | c.546-2A>G                           | p.Arg182Serfs*6      | 1                                |
| <i>MSH2</i> | NM_000251.2 | c.1552_1553_del                      | p.(Gln518Valfs*10)   | 2                                |
| <i>MSH2</i> | NM_000251.2 | c.1807G>A                            | p.(Asp603Asn)        | 2                                |
| <i>MSH2</i> | NM_000251.2 | c.696_697del                         | p.(Ser233Hisfs*22)   | 2                                |
| <i>MSH2</i> | NM_000251.2 | c.1667_1671del                       | p.(Leu556Phefs*4)    | 1                                |
| <i>MSH2</i> | NM_000251.2 | c.942+3A>T                           | p.(Val265_Gln314del) | 1                                |
| <i>MSH6</i> | NM_000179.2 | c.152-?_457+?del                     | p.?                  | 1                                |
| <i>MSH6</i> | NM_000179.2 | c.3013C>T                            | p.Arg1005*           | 1                                |
| <i>MSH6</i> | NM_000179.2 | c.3195_3199del                       | p.(Asn1065Lysfs*13)  | 1                                |
| <i>MSH6</i> | NM_000179.2 | c.3306del                            | p.Phe1104Leufs*11    | 1                                |
| <i>MSH6</i> | NM_000179.2 | c.900dup                             | p.(Lys301Glufs*11)   | 1                                |

**Supplementary Table S2.** Detailed characteristics of adenoma specimens (n = 68) collected from 57 Lynch syndrome patients.

|            |           | Germline mutation |             |             |                         | Adenoma characteristics |                 |                        |                             |                        |             |                         | Method(s) applied on the sample <sup>8</sup> |                                                            |     |     |      |        |
|------------|-----------|-------------------|-------------|-------------|-------------------------|-------------------------|-----------------|------------------------|-----------------------------|------------------------|-------------|-------------------------|----------------------------------------------|------------------------------------------------------------|-----|-----|------|--------|
| Patient ID | Sample ID | Age <sup>1</sup>  | Gene        | Transcript  | HGVS Mutation           | HGVS Protein            | Dysplasia grade | Histology <sup>2</sup> | Colonic region <sup>3</sup> | Size (mm) <sup>4</sup> | CIMP status | MSI status <sup>5</sup> | MMR IHC <sup>6</sup>                         | CRC diagnosed <sup>7</sup>                                 | Seq | TSG | CIMP | LINE-1 |
| 3          | 164Ad     | 45                | <i>MLH1</i> | NM_000249.3 | c.1731+2247_1897-402del | p.Pro579_Glu633del      | low             | TA                     | VI                          | 2-3                    | -           | MSS?                    | +                                            |                                                            | x   |     |      | x      |
| 5          | 165Ad     |                   | <i>MLH1</i> | NM_000249.3 | c.1731+2247_1897-402del | p.Pro579_Glu633del      | high            | TA                     | V                           |                        | -           | MSI                     | -(MLH1, PMS2)                                |                                                            | x   | x   | x    | x      |
| 6          | 247Ad     | 50                | <i>MSH2</i> | NM_000251.2 | c.1552_1553_del         | p.(Gln518Valfs*10)      | high            | TA                     | VI                          | 10                     | -           | MSI                     | -(MSH2, MSH6)                                |                                                            | x   | x   | x    | x      |
| 12         | 670Ad     | 36                | <i>MSH2</i> | NM_000251.2 | c.1552_1553_del         | p.(Gln518Valfs*10)      | low             | TA                     | V                           | small                  | -           |                         | +                                            |                                                            | x   | x   | x    | x      |
| 13         | 671Ad     | 62                | <i>MSH2</i> | NM_000251.2 | c.1667_1671del          | p.Leu556Phefs*4         | high            | TA                     | VI                          | 10                     | -           | MSI                     | -(MSH2, MSH6)                                |                                                            | x   | x   | x    | x      |
| 13         | 248Ad     | 59                | <i>MSH2</i> | NM_000251.2 | c.1667_1671del          | p.Leu556Phefs*4         | low             | TA                     | I                           | 2-3                    | -           | MSS?                    | +                                            |                                                            | x   | x   | x    | x      |
| 16         | 188Ad     | 68                | <i>MSH6</i> | NM_000179.2 | c.900dup                | p.(Lys301Glufs*11)      | low             | TA                     | VI                          | small                  | -           | MSI                     | -(MSH6)                                      | metachronous (before)                                      | x   | x   | x    | x      |
| 16         | 187Ad     | 67                | <i>MSH6</i> | NM_000179.2 | c.900dup                | p.(Lys301Glufs*11)      | low             | TA                     | IV                          | small                  | -           | MSS                     | +                                            | metachronous (before)                                      | x   | x   | x    | x      |
| 16         | 672Ad     | 70                | <i>MSH6</i> | NM_000179.2 | c.900dup                | p.(Lys301Glufs*11)      | low             | TVA                    | V                           | small                  | -           |                         | +                                            | metachronous (before)                                      | x   | x   | x    | x      |
| 17         | 250Ad     | 54                | <i>MLH1</i> | NM_000249.3 | c.546-2A>G              | p.Arg182Serfs*6         | low             | TA                     | I                           | small                  | -           | MSI                     | -(MLH1, PMS2)                                |                                                            | x   | x   | x    | x      |
| 17         | 249Ad     | 45                | <i>MLH1</i> | NM_000251.2 | c.546-2A>G              | p.Arg182Serfs*6         | low             | TA                     | I                           |                        | +           | MSS?                    | +                                            |                                                            | x   | x   | x    | x      |
| 18         | 100Ad     | 43                | <i>MLH1</i> | NM_000249.3 | c.454-1G>A              | p.Glu153Phefs*8         | high            | TA                     | III                         | 10                     | -           | MSI                     | -(MLH1, PMS2)                                | synchronous - III                                          | x   | x   | x    | x      |
| 19         | 168Ad     | 64                | <i>MLH1</i> | NM_000249.3 | c.1731+2247_1897-402del | p.Pro579_Glu633del      | low             | TA                     | I                           | <10                    | -           | MSI                     | -(MLH1, PMS2)                                |                                                            | x   | x   | x    | x      |
| 19         | 169Ad     | 63                | <i>MLH1</i> | NM_000249.3 | c.1731+2247_1897-402del | p.Pro579_Glu633del      | high            | TVA                    | I                           | 8                      | -           | MSI                     | -(MLH1, PMS2)                                |                                                            | x   | x   | x    | x      |
| 21         | 674Ad     | 34                | <i>MLH1</i> | NM_000249.3 | c.320T>G                | p.Ile107Arg             | high            | TA                     | II                          | 20                     | -           | MSI                     | -(MLH1, PMS2)                                | synchronous - II (ca in adenomate gradus 2)                | x   | x   | x    | x      |
| 21         | 675Ad     | 34                | <i>MLH1</i> | NM_000249.3 | c.320T>G                | p.Ile107Arg             | high            | TA                     | III                         | 7                      | -           | MSI                     | -(MLH1, PMS2)                                |                                                            | x   | x   | x    | x      |
| 22         | 170Ad     | 31                | <i>MLH1</i> | NM_000249.3 | c.454-1G>A              | p.Glu153Phefs*8         | high            | TA                     | VI                          | 15                     | -           | MSI                     | -(MLH1, PMS2)                                |                                                            | x   | x   | x    | x      |
| 24         | 251Ad     | 42                | <i>MSH2</i> | NM_000251.2 | c.696_697del            | p.(Ser233Hisfs*22)      | low             | TA                     | VI                          | 3                      | -           | MSI                     | -(MSH2, MSH6)                                |                                                            | x   | x   | x    | x      |
| 26         | 171Ad     | 49                | <i>MLH1</i> | NM_000249.3 | c.1731+2247_1897-402del | p.Pro579_Glu633del      | low             | TA                     | V                           | >10                    | -           | MSI                     | -(MLH1, PMS2)                                |                                                            | x   | x   | x    | x      |
| 31         | 172Ad     | 56                | <i>MLH1</i> | NM_000249.3 | c.1731+2247_1897-402del | p.Pro579_Glu633del      | low             | TA                     | I / III                     |                        | -           | MSS                     | -(MLH1, PMS2)                                |                                                            |     | x   | x    | x      |
| 31         | 252Ad     | 48                | <i>MLH1</i> | NM_000249.3 | c.1975C>T               | p.Arg659*               | low             | TA                     | I                           | 3                      | -           | MSI                     | -(MLH1)                                      |                                                            | x   | x   | x    | x      |
| 31         | 253Ad     | 48                | <i>MLH1</i> | NM_000249.3 | c.1975C>T               | p.Arg659*               | high            | TA                     | V                           | 7                      | -           | MSI                     | -(MLH1, PMS2)                                |                                                            | x   | x   | x    | x      |
| 31         | 173Ad     | 53                | <i>MLH1</i> | NM_000249.3 | c.1731+2247_1897-402del | p.Pro579_Glu633del      | low             | TA                     | V                           |                        | -           | MSS                     |                                              |                                                            | x   | x   | x    | x      |
| 42         | 254Ad     | 66                | <i>MLH1</i> | NM_000249.3 | c.543C>G                | p.?                     | low             | TA                     | II                          | small                  | -           | MSI                     | -(MLH1, PMS2)                                |                                                            | x   | x   | x    | x      |
| 42         | 255Ad     | 66                | <i>MLH1</i> | NM_000249.3 | c.543C>G                | p.?                     | low             | TA                     | I                           | small                  | -           | MSI                     | -(MLH1, PMS2)                                |                                                            | x   | x   | x    | x      |
| 42         | 256Ad     | 66                | <i>MLH1</i> | NM_000249.3 | c.543C>G                | p.?                     | low             | TA                     | II                          | small                  | +           | MSI                     | -(MLH1, PMS2)                                |                                                            | x   | x   | x    | x      |
| 42         | 257Ad     | 66                | <i>MLH1</i> | NM_000249.3 | c.543C>G                | p.?                     | low             | TA                     | III                         | 4                      | -           | MSI?                    | -(MLH1, PMS2)                                |                                                            | x   | x   | x    | x      |
| 44         | 258Ad     | 69                | <i>MSH2</i> | NM_000251.2 | c.1807G>A               | p.(Asp603Asn)           | low             | TA                     | I                           | 10                     | -           | MSI                     | -(MSH2, MSH6)                                |                                                            | x   | x   | x    | x      |
| 45         | 259Ad     | 41                | <i>MLH1</i> | NM_000249.3 | c.1731+2247_1897-402del | p.Pro579_Glu633del      | low             | TA                     | VI                          | small                  | -           | MSS                     | +                                            |                                                            | x   | x   | x    | x      |
| 46         | 190Ad     | 54                | <i>MLH1</i> | NM_000249.3 | c.454-1G>A              | p.Glu153Phefs*8         | high            | TA                     | IV                          |                        | -           | MSI                     | -(MLH1, PMS2)                                | metachronous (before and after)                            |     | x   | x    | x      |
| 55         | 260Ad     | 38                | <i>MLH1</i> | NM_000249.3 | c.1731+2247_1897-402del | p.Pro579_Glu633del      | low             | TA                     | II                          | 5                      | -           |                         | -(MLH1)                                      |                                                            | x   |     |      | x      |
| 60         | 099Ad     | 43                | <i>MLH1</i> | NM_000249.3 | c.1731+2247_1897-402del | p.Pro579_Glu633del      | high            | TVA                    | III                         | large                  | +           | MSI                     | -(MLH1, PMS2)                                | metachronous (before); synchronous (region not known)      |     | x   | x    | x      |
| 63         | 63Ad      | 62                | <i>MLH1</i> | NM_000249.3 | c.1731+2247_1897-402del | p.Pro579_Glu633del      | low             | TA                     | III                         | 6                      | -           |                         | -(MLH1, PMS2)                                |                                                            |     |     |      |        |
| 65         | 151Ad     | 52                | <i>MLH1</i> | NM_000249.3 | c.307-?_545+?del        | p.(Ala103Valfs*9)       | low             | TA                     | I                           | 5                      | -           |                         | -(MLH1, PMS2)                                | metachronous (before)                                      | x   |     |      | x      |
| 68         | 193Ad     | 46                | <i>MLH1</i> | NM_000249.3 | c.1731+2247_1897-402del | p.Pro579_Glu633del      | low             | TA                     | V                           | small                  | -           |                         | -(MSH2, MSH6)                                | metachronous (before)                                      |     |     |      | x      |
| 69         | 101Ad     | 62                | <i>MLH1</i> | NM_000249.3 | c.454-1G>A              | p.Glu153Phefs*8         | low             | TA                     | V                           | 5                      | +           | MSI                     | -(MLH1)                                      | metachronous (before and after)                            | x   | x   | x    | x      |
| 69         | 150Ad     | 74                | <i>MLH1</i> | NM_000249.3 | c.454-1G>A              | p.Glu153Phefs*8         | high            | TVA                    | V                           | 10                     | +           | MSI                     | -(MLH1, PMS2)                                | metachronous (before)                                      |     | x   | x    | x      |
| 73         | 148Ad     | 56                | <i>MLH1</i> | NM_000249.3 | c.1731+2247_1897-402del | p.Pro579_Glu633del      | low             | TA                     | I                           | <10                    | -           | MSS                     | +                                            | metachronous (before and after)                            | x   | x   | x    | x      |
| 73         | 677Ad     | 58                | <i>MLH1</i> | NM_000249.3 | c.1731+2247_1897-402del | p.Pro579_Glu633del      | high            | TA                     | I-II                        | 3-4                    | -           |                         | +                                            | metachronous (before); synchronous I-II (1-5cm from tumor) | x   | x   | x    | x      |
| 74         | 261Ad     | 61                | <i>MLH1</i> | NM_000249.3 | c.1731+2247_1897-402del | p.Pro579_Glu633del      | high            | TVA                    | III                         | 20                     | -           |                         | -(MLH1, PMS2)                                |                                                            | x   |     |      | x      |
| 76         | 679Ad     | 59                | <i>MLH1</i> | NM_000249.3 | c.1731+2247_1897-402del | p.Pro579_Glu633del      | high            | TA                     | III                         | 7                      | -           |                         | -(MLH1, PMS2)                                |                                                            |     |     |      | x      |
| 76         | 263Ad     | 50                | <i>MLH1</i> | NM_000249.3 | c.1731+2247_1897-402del | p.Pro579_Glu633del      | high            | TA                     | IV                          | <10                    | -           | MSI                     | -(MLH1, PMS2)                                |                                                            | x   | x   | x    | x      |
| 76         | 264Ad     | 53                | <i>MLH1</i> | NM_000249.3 | c.1731+2247_1897-402del | p.Pro579_Glu633del      | low             | TA                     | I                           | <5                     | -           | MSS?                    | +                                            |                                                            | x   | x   | x    | x      |
| 77         | 195Ad     | 38                | <i>MLH1</i> | NM_000249.3 | c.1731+2247_1897-402del | p.Pro579_Glu633del      | low             | TA                     | IV-V                        | 8                      | -           | MSI                     | -(MLH1, PMS2)                                |                                                            | x   | x   | x    | x      |
| 82         | 106Ad     |                   | <i>MLH1</i> | NM_000249.3 | c.454-1G>A              | p.Glu153Phefs*8         | low             | TVA                    | I                           |                        | -           | MSI                     | -(MLH1, PMS2)                                | synchronous I                                              | x   | x   | x    | x      |
| 83         | 160Ad     | 68                | <i>MSH2</i> | NM_000251.2 | c.696_697del            | p.(Ser233Hisfs*22)      | low             | TA                     | II                          |                        | -           | MSS                     | -(MSH2, MSH6)                                | metachronous (after)                                       | x   | x   | x    | x      |
| 83         | 83Ad      | 68                | <i>MSH2</i> | NM_000251.2 | c.696_697del            | p.(Ser233Hisfs*22)      | low             | TA                     | I                           |                        | -           |                         | +                                            | metachronous (after)                                       |     |     |      |        |
| 85         | 265Ad     | 36                | <i>MLH1</i> | NM_000249.3 | c.1731+2247_1897-402del | p.Pro579_Glu633del      | high            | TA                     | VI                          | 10                     | -           | MSI                     | -(MLH1, PMS2)                                |                                                            | x   | x   | x    | x      |
| 85         | 266Ad     | 36                | <i>MLH1</i> | NM_000249.3 | c.1731+2247_1897-402del | p.Pro579_Glu633del      | low             | TA                     | VI                          | 10                     | +           | MSI                     | -(MLH1, PMS2)                                |                                                            | x   | x   | x    | x      |
| 87         | 680Ad     | 45                | <i>MLH1</i> | NM_000249.3 | c.454-1G>A              | p.Glu153Phefs*8         | low             | TVA                    | III                         | 25                     | -           | MSI                     | -(MLH1, PMS2)                                |                                                            | x   | x   | x    | x      |
| 89         | 682Ad     | 52                | <i>MLH1</i> | NM_000249.3 | c.1731+2247_1897-402del | p.Pro579_Glu633del      | high            | TA                     | III                         | 25                     | -           |                         | -(MLH1, PMS2)                                | synchronous II                                             | x   | x   | x    | x      |
| 90         | 684Ad     | 50                | <i>MLH1</i> | NM_000249.3 | c.1731+2247_1897-402del | p.Pro579_Glu633del      | low             | TA                     | II                          | >10                    | -           |                         | -(MLH1, PMS2)                                |                                                            | x   | x   | x    | x      |
| 90         | 196Ad     | 47                | <i>MLH1</i> | NM_000249.3 | c.1731+2247_1897-402del | p.Pro579_Glu633del      | low             | TA                     | III                         | 6                      | -           | MSI?                    | -(MLH1, PMS2)                                |                                                            | x   | x   | x    | x      |
| 95         | 268Ad     | 54                | <i>MLH1</i> | NM_000249.3 | c.1731+2247_1897-402del | p.Pro579_Glu633del      | low             | TA                     | II                          | small                  | -           | MSS                     | +                                            |                                                            | x   | x   | x    | x      |
| 95         | 197Ad     | 63                | <i>MLH1</i> | NM_000249.3 | c.1731+2247_1897-402del | p.Pro579_Glu633del      | low             | TA                     | III                         | 2                      | -           |                         | +                                            |                                                            | x   | x   |      | x      |
| 98         | 270Ad     | 48                | <i>MLH1</i> | NM_000249.3 | c.1039-1G>A             | p.(Thr347Lysfs*8)       | high            | TA                     | V                           | >10                    | -           | MSI                     | -(MLH1, PMS2)                                |                                                            | x   | x   | x    | x      |
| 101        | 271Ad     |                   | <i>MLH1</i> | NM_000249.3 | c.1731+2247_1897-402del | p.Pro579_Glu633del      | low             | TA                     | V                           | small                  | -           | MSS                     | +                                            |                                                            | x   | x   | x    | x      |
| 104        | 272Ad     | 74                | <i>MLH1</i> | NM_000249.3 | c.1731+2247_1897-402del | p.Pro579_Glu633del      | high            | TA                     | III                         | 10                     | -           | MSI                     | -(MLH1, PMS2)                                | metachronous (before)                                      | x   | x   | x    | x      |
| 108        | 685Ad     | 46                | <i>MLH1</i> | NM_000249.3 | c.298C>T                | p.(Arg100*)             | low             | TA                     | III                         | >5                     | -           | MSI                     | -(MLH1, PMS2)                                |                                                            | x   | x   | x    | x      |
| 112        | 686Ad     | 48                | <i>MSH6</i> | NM_000179.2 | c.3195_3199del          | p.(Asn1065Lysfs*5)      | high            | TA                     | VI                          | 20-30                  | -           | MSS                     | +                                            |                                                            | x   | x   | x    | x      |

|     |       |    |             |             |                                  |                      |      |     |     |       |   |     |                                |                       |   |   |   |   |
|-----|-------|----|-------------|-------------|----------------------------------|----------------------|------|-----|-----|-------|---|-----|--------------------------------|-----------------------|---|---|---|---|
| 116 | 687Ad | 60 | <i>MSH6</i> | NM_000179.2 | c.152-?_457+?del                 | p.?                  | high | TVA | III | large | - | MSI | -( <i>MSH6</i> )               | metachronous (before) | x | x | x | x |
| 116 | 689Ad | 60 | <i>MSH6</i> | NM_000179.2 | c.152-?_457+?del                 | p.?                  | low  | TA  | III | 10-15 | - |     | -( <i>MSH6</i> )               | metachronous (before) | x | x | x | x |
| 120 | 690Ad | 26 | <i>MLH1</i> | NM_000249.3 | c.1731+2247_1897-402del          | p.Pro579_Glu633del   | low  | TA  | III |       | - |     | +                              |                       | x | x | x | x |
| 122 | 691Ad | 51 | <i>MLH1</i> | NM_000249.3 | c.1731+2247_1897-402del          | p.Pro579_Glu633del   | low  | TA  | I   | >10   | - | MSI | -( <i>MLH1</i> , <i>PMS2</i> ) |                       | x | x | x | x |
| 123 | 692Ad | 64 | <i>MLH1</i> | NM_000249.3 | c.1731+2247_1897-402del          | p.Pro579_Glu633del   | low  | TA  | III | <10   | - | MSI | -( <i>MLH1</i> , <i>PMS2</i> ) |                       | x | x | x | x |
| 123 | 693Ad | 61 | <i>MLH1</i> | NM_000249.3 | c.1731+2247_1897-402del          | p.Pro579_Glu633del   | low  | TA  | IV  | <10   | - | MSS | +                              |                       | x | x | x | x |
| 124 | 694Ad | 43 | <i>MLH1</i> | NM_000249.3 | c.(207+1_208-1)_(453+1_454-1)del | p.Lys70_Thr151del    | low  | TA  | II  |       |   |     | +                              |                       |   |   |   | x |
| 126 | 695Ad | 49 | <i>MSH2</i> | NM_000251.2 | c.942+3A>T                       | p.(Val265_Gln314del) | low  | TA  | VI  |       | - | MSI | -( <i>MSH2</i> , <i>MSH6</i> ) |                       | x | x | x | x |

<sup>1</sup> Patient's age (years) at the time of biopsy.

<sup>2</sup> TA, tubular adenoma; TVA, tubulovillous adenoma.

<sup>3</sup> I, cecum; II, ascending colon; III, transversum; IV, descending colon; V, sigmoid colon; V, rectum.

<sup>4</sup> Size is given in numerical or verbal form, whichever was available.

<sup>5</sup> Question mark after MSI or MSS status indicates that only one probe produced clearly interpretable result (for MSS?) or due to poor quality, the result was weakly interpretable (MSI?).

<sup>6</sup> If immunohistochemistry was negative (i.e. protein expression was lost), lost MMR proteins are given in parentheses.

<sup>7</sup> If the patient was diagnosed with colorectal cancer, timing of the diagnosis related to adenoma sample is given. Roman numerals indicate colonic location (please, see a footnote 3). Other relevant information available is given in parentheses.

<sup>8</sup> CIMP, MS-MLPA for CIMP markers; LINE-1, MS-MLPA for LINE-1; Seq, Ion Torrent sequencing; TSG, MS-MLPA for selected candidate tumor suppressor genes.

Abbreviations: CIMP, CpG island methylator phenotype; CRC, colorectal cancer; HGVS, Human Genome Variation Society; IHC, immunohistochemistry; MMR, DNA mismatch repair; MSI, microsatellite instability; MSS, microsatellite stable.

**Supplementary Table S3.** Somatic non-synonymous mutations meeting our selection criteria (see Materials and Methods).

| SampleID | Chr | Position (hg19) | Gene   | HGVS protein | Ref/Alt | Cosmic Mutation ID (COSMIC v.71) | Quality | Depth | VAF  | Sequence Ontology           | <i>In silico</i> predictions <sup>1</sup> |
|----------|-----|-----------------|--------|--------------|---------|----------------------------------|---------|-------|------|-----------------------------|-------------------------------------------|
| 101Ad    | 1   | 162724506       | DDR2   | p.Thr93Ile   | C/T     |                                  | 49.8    | 298   | 0.07 | missense_variant            | 1 of 6 Predicted as Damaging              |
| 101Ad    | 1   | 162724533       | DDR2   | p.Thr102Ile  | C/T     |                                  | 107.9   | 301   | 0.10 | missense_variant            | 6 of 6 Predicted as Damaging              |
| 260Ad    | 1   | 162724535       | DDR2   | p.Gln103Ter  | C/T     |                                  | 70.3    | 303   | 0.08 | stop_gained                 | 2 of 6 Predicted as Damaging              |
| 685Ad    | 1   | 162724542       | DDR2   | p.Arg105His  | G/A     |                                  | 1673.7  | 838   | 0.28 | missense_variant            | 6 of 6 Predicted as Damaging              |
| 249Ad    | 1   | 162724575       | DDR2   | p.Pro116Leu  | C/T     |                                  | 38.1    | 311   | 0.06 | missense_variant            | 5 of 6 Predicted as Damaging              |
| 151Ad    | 1   | 162724598       | DDR2   | p.Arg124Trp  | C/T     | 4024594,4024595                  | 46.7    | 435   | 0.06 | missense_variant            | 6 of 6 Predicted as Damaging              |
| 101Ad    | 1   | 162724610       | DDR2   | p.Arg128Cys  | C/T     |                                  | 53.9    | 304   | 0.07 | missense_variant            | 6 of 6 Predicted as Damaging              |
| 101Ad    | 1   | 162724611       | DDR2   | p.Arg128His  | G/A     |                                  | 64.4    | 304   | 0.08 | missense_variant            | 4 of 6 Predicted as Damaging              |
| 689Ad    | 1   | 162729617       | DDR2   | p.Gly235Ser  | G/A     |                                  | 170.6   | 167   | 0.19 | missense_variant            | 5 of 6 Predicted as Damaging              |
| 249Ad    | 1   | 162729669       | DDR2   | p.Pro252Leu  | C/T     |                                  | 268.2   | 499   | 0.13 | missense_variant            | 5 of 6 Predicted as Damaging              |
| 101Ad    | 1   | 162740123       | DDR2   | p.Thr442Ile  | C/T     |                                  | 139.8   | 450   | 0.10 | missense_variant            | 3 of 6 Predicted as Damaging              |
| 101Ad    | 1   | 162740131       | DDR2   | p.Leu445Phe  | C/T     |                                  | 133.5   | 450   | 0.10 | missense_variant            | 6 of 6 Predicted as Damaging              |
| 101Ad    | 1   | 162740140       | DDR2   | p.Pro448Ser  | C/T     |                                  | 71.7    | 449   | 0.07 | missense_variant            | 2 of 6 Predicted as Damaging              |
| 264Ad    | 1   | 162740174       | DDR2   | p.Ser459Phe  | C/T     |                                  | 31.2    | 53    | 0.11 | missense_variant            | 5 of 6 Predicted as Damaging              |
| 264Ad    | 1   | 162740224       | DDR2   | p.Pro476Ser  | C/T     |                                  | 39.3    | 52    | 0.13 | missense_variant            | 6 of 6 Predicted as Damaging              |
| 151Ad    | 1   | 162740245       | DDR2   | p.Glu483Ter  | G/T     |                                  | 149.0   | 421   | 0.10 | stop_gained                 | 2 of 6 Predicted as Damaging              |
| 151Ad    | 1   | 162741831       | DDR2   | p.Lys508Glu  | A/G     |                                  | 34.9    | 599   | 0.05 | missense_variant            | 3 of 6 Predicted as Damaging              |
| 101Ad    | 1   | 162741847       | DDR2   | p.Ser513Asn  | G/A     |                                  | 92.7    | 384   | 0.09 | missense_variant            | 1 of 6 Predicted as Damaging              |
| 100Ad    | 1   | 162741910       | DDR2   | p.Gly534Glu  | G/A     |                                  | 113.5   | 229   | 0.12 | missense_variant            | 6 of 6 Predicted as Damaging              |
| 151Ad    | 1   | 162743259       | DDR2   | p.Val577Ile  | G/A     |                                  | 149.8   | 382   | 0.11 | missense_variant            | 6 of 6 Predicted as Damaging              |
| 101Ad    | 1   | 162743325       | DDR2   | p.Ala599Thr  | G/A     |                                  | 60.9    | 602   | 0.06 | missense_variant            | 2 of 6 Predicted as Damaging              |
| 249Ad    | 1   | 162743334       | DDR2   | p.Pro602Ser  | C/T     |                                  | 63.1    | 663   | 0.06 | missense_variant            | 4 of 6 Predicted as Damaging              |
| 101Ad    | 1   | 162743346       | DDR2   | p.Ala606Thr  | G/A     |                                  | 92.9    | 601   | 0.07 | missense_variant            | 6 of 6 Predicted as Damaging              |
| 100Ad    | 1   | 162745452       | DDR2   | p.Leu623Phe  | C/T     |                                  | 37.4    | 443   | 0.05 | missense_variant            | 4 of 6 Predicted as Damaging              |
| 151Ad    | 1   | 162745460       | DDR2   | p.Glu625Asp  | G/T     |                                  | 33.1    | 265   | 0.06 | missense_variant            | 5 of 6 Predicted as Damaging              |
| 100Ad    | 1   | 162745533       | DDR2   | p.Leu650Phe  | C/T     |                                  | 37.1    | 445   | 0.05 | missense_variant            | 3 of 6 Predicted as Damaging              |
| 249Ad    | 1   | 162745557       | DDR2   | p.Glu658Lys  | G/A     |                                  | 103.2   | 352   | 0.09 | missense_variant            | 5 of 6 Predicted as Damaging              |
| 260Ad    | 1   | 162748389       | DDR2   | p.Ser768Asn  | G/A     |                                  | 156.1   | 570   | 0.09 | missense_variant            | 6 of 6 Predicted as Damaging              |
| 260Ad    | 1   | 162748425       | DDR2   | p.Thr780Ile  | C/T     |                                  | 75.4    | 569   | 0.07 | missense_variant            | 3 of 6 Predicted as Damaging              |
| 260Ad    | 1   | 162748442       | DDR2   | p.Glu786Lys  | G/A     |                                  | 122.2   | 567   | 0.08 | missense_variant            | 4 of 6 Predicted as Damaging              |
| 261Ad    | 2   | 29445226        | ALK    | p.Glu1167Lys | C/T     |                                  | 86.3    | 266   | 0.10 | missense_variant            | 6 of 6 Predicted as Damaging              |
| 151Ad    | 2   | 29445273        | ALK    | p.Thr1151Met | G/A     | 98478                            | 36.4    | 699   | 0.05 | missense_variant            | 5 of 6 Predicted as Damaging              |
| 260Ad    | 2   | 212288922       | ERBB4  | p.Pro942Ser  | G/A     | 4090864,4090865                  | 152.8   | 483   | 0.10 | missense_variant            | 6 of 6 Predicted as Damaging              |
| 249Ad    | 2   | 212530054       | ERBB4  | p.Thr622Ile  | G/A     |                                  | 52.4    | 427   | 0.06 | missense_variant            | 4 of 6 Predicted as Damaging              |
| 249Ad    | 2   | 212530057       | ERBB4  | p.Cys621Tyr  | C/T     |                                  | 97.3    | 429   | 0.08 | missense_variant            | 6 of 6 Predicted as Damaging              |
| 689Ad    | 2   | 212530084       | ERBB4  | p.Arg612Gln  | C/T     | 232263                           | 194.0   | 154   | 0.21 | missense_variant            | 2 of 6 Predicted as Damaging              |
| 101Ad    | 2   | 212530132       | ERBB4  | p.Gly59Asp   | C/T     |                                  | 79.4    | 526   | 0.07 | missense_variant            | 6 of 6 Predicted as Damaging              |
| 101Ad    | 2   | 212530136       | ERBB4  | p.Asp595Asn  | C/T     |                                  | 110.9   | 526   | 0.08 | missense_variant            | 2 of 6 Predicted as Damaging              |
| 260Ad    | 2   | 212530151       | ERBB4  | p.Val590Met  | C/T     |                                  | 143.8   | 553   | 0.09 | missense_variant            | 5 of 6 Predicted as Damaging              |
| 101Ad    | 2   | 212530153       | ERBB4  | p.Cys589Tyr  | C/T     |                                  | 99.6    | 526   | 0.08 | missense_variant            | 6 of 6 Predicted as Damaging              |
| 689Ad    | 2   | 212576808       | ERBB4  | p.Gly364Glu  | C/T     |                                  | 166.4   | 1098  | 0.07 | missense_variant            | 5 of 6 Predicted as Damaging              |
| 689Ad    | 2   | 212576809       | ERBB4  | p.Gly364Arg  | C/T     |                                  | 58.4    | 1098  | 0.05 | missense_variant            | 5 of 6 Predicted as Damaging              |
| 689Ad    | 2   | 212576820       | ERBB4  | p.Thr360Ile  | G/A     |                                  | 252.5   | 1099  | 0.09 | missense_variant            | 6 of 6 Predicted as Damaging              |
| 101Ad    | 2   | 212576847       | ERBB4  | p.Ser351Asn  | C/T     |                                  | 185.4   | 1796  | 0.06 | missense_variant            | 4 of 6 Predicted as Damaging              |
| 261Ad    | 2   | 212576868       | ERBB4  | p.Ser344Leu  | G/A     |                                  | 77.3    | 468   | 0.07 | missense_variant            | 2 of 6 Predicted as Damaging              |
| 689Ad    | 2   | 212576898       | ERBB4  | p.Cys334Tyr  | C/T     |                                  | 58.7    | 1095  | 0.05 | missense_variant            | 5 of 6 Predicted as Damaging              |
| 260Ad    | 2   | 212578301       | ERBB4  | p.Gly319Glu  | C/T     | 272140                           | 47.0    | 137   | 0.09 | missense_variant            | 6 of 6 Predicted as Damaging              |
| 261Ad    | 2   | 212578301       | ERBB4  | p.Gly319Glu  | C/T     | 272140                           | 35.0    | 255   | 0.06 | missense_variant            | 6 of 6 Predicted as Damaging              |
| 101Ad    | 2   | 212578340       | ERBB4  | p.Arg306His  | C/T     |                                  | 90.9    | 1071  | 0.06 | missense_variant            | 5 of 6 Predicted as Damaging              |
| 170Ad    | 2   | 212578340       | ERBB4  | p.Arg306His  | C/T     |                                  | 195.0   | 350   | 0.13 | missense_variant            | 5 of 6 Predicted as Damaging              |
| 689Ad    | 2   | 212587135       | ERBB4  | p.Cys289Tyr  | C/T     |                                  | 74.5    | 391   | 0.08 | missense_variant            | 6 of 6 Predicted as Damaging              |
| 101Ad    | 2   | 212587141       | ERBB4  | p.Ala287Val  | G/A     |                                  | 76.2    | 1729  | 0.05 | missense_variant            | 6 of 6 Predicted as Damaging              |
| 689Ad    | 2   | 212587172       | ERBB4  | p.His277Tyr  | G/A     |                                  | 79.0    | 395   | 0.08 | missense_variant            | 2 of 6 Predicted as Damaging              |
| 260Ad    | 2   | 212587208       | ERBB4  | p.Thr265Ala  | T/C     | 1614290,3709393                  | 70.3    | 220   | 0.10 | missense_variant            | 2 of 6 Predicted as Damaging              |
| 151Ad    | 2   | 212652770       | ERBB4  | p.Ser179Leu  | G/A     |                                  | 57.7    | 646   | 0.06 | missense_variant            | 3 of 6 Predicted as Damaging              |
| 151Ad    | 2   | 212652788       | ERBB4  | p.Ser173Phe  | G/A     |                                  | 57.5    | 647   | 0.06 | missense_variant            | 4 of 6 Predicted as Damaging              |
| 101Ad    | 3   | 41266045        | CTNNB1 | p.Met14Ile   | G/A     |                                  | 44.5    | 632   | 0.05 | missense_variant            | 2 of 6 Predicted as Damaging              |
| 689Ad    | 3   | 41266073        | CTNNB1 | p.His24Tyr   | C/T     | 5748                             | 99.9    | 214   | 0.12 | missense_variant            | 3 of 6 Predicted as Damaging              |
| 260Ad    | 3   | 41266079        | CTNNB1 | p.Gln26Ter   | C/T     |                                  | 54.9    | 609   | 0.05 | stop_gained                 | 2 of 6 Predicted as Damaging              |
| 260Ad    | 3   | 41266089        | CTNNB1 | p.Ser29Phe   | C/T     | 5694                             | 54.9    | 609   | 0.05 | missense_variant            | 3 of 6 Predicted as Damaging              |
| 260Ad    | 3   | 41266101        | CTNNB1 | p.Ser33Phe   | C/T     | 5669                             | 46.9    | 611   | 0.05 | missense_variant            | 5 of 6 Predicted as Damaging              |
| 268Ad    | 3   | 41266124        | CTNNB1 | p.Thr41Ala   | A/G     | 5664                             | 42.1    | 660   | 0.05 | missense_variant            | 5 of 6 Predicted as Damaging              |
| 674Ad    | 3   | 41266124        | CTNNB1 | p.Thr41Ala   | A/G     | 5664                             | 4643.3  | 812   | 0.54 | missense_variant            | 5 of 6 Predicted as Damaging              |
| 270Ad    | 3   | 41266134        | CTNNB1 | p.Ser45del   | C/T/-   | 33668,6128                       | 5374.8  | 645   | 0.69 | disruptive_inframe_deletion |                                           |
| 272Ad    | 3   | 41266136        | CTNNB1 | p.Ser45Pro   | T/C     | 5663                             | 6216.8  | 759   | 0.68 | missense_variant            | 5 of 6 Predicted as Damaging              |
| 187Ad    | 3   | 41266137        | CTNNB1 | p.Ser45Phe   | C/T     | 5667                             | 2960.1  | 947   | 0.37 | missense_variant            | 5 of 6 Predicted as Damaging              |
| 682Ad    | 3   | 41266137        | CTNNB1 | p.Ser45Phe   | C/T     | 5667                             | 2414.6  | 828   | 0.35 | missense_variant            | 5 of 6 Predicted as Damaging              |
| 261Ad    | 3   | 41266143        | CTNNB1 | p.Ser47Asn   | G/A     | 5712                             | 64.4    | 74    | 0.16 | missense_variant            | 3 of 6 Predicted as Damaging              |
| 169Ad    | 3   | 178936096       | PIK3CA | p.Gln546His  | G/T     | 24712,3205634                    | 343.6   | 2332  | 0.08 | missense_variant            | 3 of 6 Predicted as Damaging              |
| 260Ad    | 3   | 178938802       | PIK3CA | p.Gln682Lys  | C/A     |                                  | 40.5    | 322   | 0.06 | missense_variant            | 2 of 6 Predicted as Damaging              |
| 101Ad    | 3   | 178938811       | PIK3CA | p.Gly685Ser  | G/A     |                                  | 39.9    | 401   | 0.06 | missense_variant            | 4 of 6 Predicted as Damaging              |
| 249Ad    | 3   | 178938836       | PIK3CA | p.Arg693His  | G/A     | 327062,327063                    | 30.6    | 384   | 0.05 | missense_variant            | 5 of 6 Predicted as Damaging              |
| 101Ad    | 3   | 178938877       | PIK3CA | p.Glu707Lys  | G/A     |                                  | 62.8    | 399   | 0.07 | missense_variant            | 5 of 6 Predicted as Damaging              |
| 260Ad    | 3   | 178938907       | PIK3CA | p.Asp717Asn  | G/A     |                                  | 48.8    | 326   | 0.07 | missense_variant            | 2 of 6 Predicted as Damaging              |
| 260Ad    | 3   | 178938914       | PIK3CA | p.Leu719Pro  | T/C     |                                  | 144.9   | 325   | 0.12 | missense_variant            | 6 of 6 Predicted as Damaging              |
| 247Ad    | 3   | 178938916       | PIK3CA | p.Lys720Gln  | A/C     |                                  | 55.9    | 75    | 0.15 | missense_variant            | 2 of 6 Predicted as Damaging              |
| 684Ad    | 3   | 178938916       | PIK3CA | p.Lys720Gln  | A/C     |                                  | 142.8   | 80    | 0.26 | missense_variant            | 2 of 6 Predicted as Damaging              |
| 689Ad    | 3   | 178938916       | PIK3CA | p.Lys720Gln  | A/C     |                                  | 131.1   | 86    | 0.23 | missense_variant            | 2 of 6 Predicted as Damaging              |
| 258Ad    | 3   | 178938917       | PIK3CA | p.Lys720Ile  | A/T     |                                  | 34.1    | 234   | 0.06 | missense_variant            | 6 of 6 Predicted as Damaging              |
| 689Ad    | 3   | 178952065       | PIK3CA | p.Met1040Ile | G/A     | 25085                            | 105.7   | 420   | 0.09 | missense_variant            | 3 of 6 Predicted as Damaging              |
| 689Ad    | 3   | 178952090       | PIK3CA | p.Gly1049Ser | G/A     | 1421012,777                      | 103.0   | 412   | 0.09 | missense_variant            | 3 of 6 Predicted as Damaging              |
| 689Ad    | 3   | 178952091       | PIK3CA | p.Gly1049Asp | G/A     | 1421013,308548                   | 103.0   | 412   | 0.09 | missense_variant            | 3 of 6 Predicted as Damaging              |
| 689Ad    | 4   | 1806101         | FGFR3  | p.Ala376Thr  | G/A     |                                  | 82.7    | 167   | 0.12 | missense_variant            | 3 of 6 Predicted as Damaging              |
| 689Ad    | 4   | 1806186         | FGFR3  | p.Pro404Leu  | C/T     |                                  | 41.6    | 158   | 0.08 | missense_variant            | 3 of 6 Predicted as Damaging              |
| 260Ad    | 4   | 1808337         | FGFR3  | p.Pro701Ser  | C/T     |                                  | 76.1    | 1041  | 0.05 | missense_variant            | 5 of 6 Predicted as Damaging              |
| 260Ad    | 4   | 1808340         | FGFR3  | p.Val702Met  | G/A     |                                  | 52.1    | 1041  | 0.05 | missense_variant            | 5 of 6 Predicted as Damaging              |
| 151Ad    | 4   | 1808913         | FGFR3  | p.Ser784Phe  | C/T     |                                  | 41.6    | 655   | 0.05 | missense_variant            | 6 of 6 Predicted as Damaging              |
| 101Ad    | 4   | 1808942         | FGFR3  | p.Asp794Asn  | G/A     |                                  | 39.9    | 896   | 0.05 | missense_variant            | 6 of 6 Predicted as Damaging              |
| 249Ad    | 4   | 1808970         | FGFR3  | p.Ser803Asn  | G/A     |                                  | 35.1    | 292   | 0.06 | missense_variant            | 1 of 6 Predicted as Damaging              |



|       |    |           |        |              |     |                                               |         |      |      |                    |                              |
|-------|----|-----------|--------|--------------|-----|-----------------------------------------------|---------|------|------|--------------------|------------------------------|
| 151Ad | 4  | 153247288 | FBXW7  | p.Arg505His  | C/T | 133117,25812,287372,287373,287374,3127975     | 53,8    | 1194 | 0,05 | missense_variant   | 4 of 6 Predicted as Damaging |
| 261Ad | 4  | 153247330 | FBXW7  | p.Gly491Asp  | C/T |                                               | 51,0    | 1311 | 0,05 | missense_variant   | 5 of 6 Predicted as Damaging |
| 151Ad | 4  | 153247369 | FBXW7  | p.Ser478Phe  | G/A |                                               | 154,8   | 1182 | 0,09 | missense_variant   | 5 of 6 Predicted as Damaging |
| 670Ad | 4  | 153249384 | FBXW7  | p.Arg465His  | C/T | 1149856,117308,117309,117310,22965            | 38,5    | 233  | 0,07 | missense_variant   | 4 of 6 Predicted as Damaging |
| 260Ad | 4  | 153249388 | FBXW7  | p.Val464Met  | C/T |                                               | 68,5    | 656  | 0,06 | missense_variant   | 5 of 6 Predicted as Damaging |
| 261Ad | 4  | 153249390 | FBXW7  | p.Thr463Ile  | G/A |                                               | 54,2    | 235  | 0,08 | missense_variant   | 4 of 6 Predicted as Damaging |
| 689Ad | 4  | 153249390 | FBXW7  | p.Thr463Ile  | G/A |                                               | 166,5   | 345  | 0,12 | missense_variant   | 4 of 6 Predicted as Damaging |
| 261Ad | 4  | 153249420 | FBXW7  | p.Cys453Tyr  | C/T |                                               | 48,1    | 238  | 0,08 | missense_variant   | 5 of 6 Predicted as Damaging |
| 689Ad | 4  | 153249424 | FBXW7  | p.Glu452Lys  | C/T |                                               | 145,2   | 344  | 0,11 | missense_variant   | 2 of 6 Predicted as Damaging |
| 101Ad | 4  | 153249441 | FBXW7  | p.Trp446Ter  | C/T | 1427742,1427743,1427744,1427745,1427746       | 86,3    | 678  | 0,07 | stop_gained        | 2 of 6 Predicted as Damaging |
| 100Ad | 4  | 153249468 | FBXW7  | p.Gly437Glu  | C/T | 3940767,3940768,3940769,3940770,3940771       | 30,6    | 496  | 0,05 | missense_variant   | 5 of 6 Predicted as Damaging |
| 151Ad | 4  | 153249471 | FBXW7  | p.Ser436Asn  | C/T |                                               | 85,2    | 352  | 0,09 | missense_variant   | 5 of 6 Predicted as Damaging |
| 689Ad | 4  | 153258983 | FBXW7  | p.Arg278Ter  | G/A | 1173027,22971,327086,327087,327088            | 52,1    | 528  | 0,06 | stop_gained        | 2 of 6 Predicted as Damaging |
| 689Ad | 7  | 55227987  | EGFR   | p.Gly485Asp  | G/A |                                               | 73,5    | 463  | 0,07 | missense_variant   | 0 of 6 Predicted as Damaging |
| 151Ad | 7  | 55241647  | EGFR   | p.Pro699Ser  | C/T | 28600                                         | 54,5    | 936  | 0,05 | missense_variant   | 5 of 6 Predicted as Damaging |
| 689Ad | 7  | 55241666  | EGFR   | p.Arg705Lys  | G/A |                                               | 230,3   | 256  | 0,17 | missense_variant   | 5 of 6 Predicted as Damaging |
| 689Ad | 7  | 55241723  | EGFR   | p.Gly724Asp  | G/A |                                               | 135,6   | 252  | 0,13 | missense_variant   | 5 of 6 Predicted as Damaging |
| 695Ad | 7  | 55241726  | EGFR   | p.Thr725Met  | C/T | 53264                                         | 7100,4  | 2628 | 0,40 | missense_variant   | 5 of 6 Predicted as Damaging |
| 261Ad | 7  | 55241728  | EGFR   | p.Val726Met  | G/A |                                               | 36,4    | 223  | 0,07 | missense_variant   | 6 of 6 Predicted as Damaging |
| 260Ad | 7  | 55242466  | EGFR   | p.Glu746Lys  | G/A | 13184                                         | 196,4   | 627  | 0,10 | missense_variant   | 3 of 6 Predicted as Damaging |
| 101Ad | 7  | 55248990  | EGFR   | p.Ala763Val  | C/T |                                               | 40,7    | 718  | 0,05 | missense_variant   | 4 of 6 Predicted as Damaging |
| 249Ad | 7  | 55248990  | EGFR   | p.Ala763Val  | C/T |                                               | 33,4    | 445  | 0,05 | missense_variant   | 4 of 6 Predicted as Damaging |
| 249Ad | 7  | 55249002  | EGFR   | p.Ala767Val  | C/T | 26445                                         | 35,6    | 445  | 0,05 | missense_variant   | 5 of 6 Predicted as Damaging |
| 260Ad | 7  | 55249019  | EGFR   | p.His773Tyr  | C/T |                                               | 67,8    | 289  | 0,08 | missense_variant   | 2 of 6 Predicted as Damaging |
| 100Ad | 7  | 55249076  | EGFR   | p.Leu792Phe  | C/T |                                               | 31,3    | 275  | 0,06 | missense_variant   | 4 of 6 Predicted as Damaging |
| 100Ad | 7  | 55249089  | EGFR   | p.Gly796Asp  | G/A | 133565                                        | 30,8    | 276  | 0,06 | missense_variant   | 6 of 6 Predicted as Damaging |
| 100Ad | 7  | 55259533  | EGFR   | p.Ala864Val  | C/T | 219795                                        | 36,4    | 223  | 0,07 | missense_variant   | 3 of 6 Predicted as Damaging |
| 689Ad | 7  | 55259535  | EGFR   | p.Glu865Lys  | G/A | 707337                                        | 49,7    | 93   | 0,12 | missense_variant   | 4 of 6 Predicted as Damaging |
| 151Ad | 7  | 55259544  | EGFR   | p.Glu868Lys  | G/A | 214350                                        | 205,3   | 237  | 0,17 | missense_variant   | 3 of 6 Predicted as Damaging |
| 100Ad | 7  | 55259550  | EGFR   | p.His870Tyr  | C/T | 53292                                         | 57,4    | 223  | 0,09 | missense_variant   | 3 of 6 Predicted as Damaging |
| 261Ad | 7  | 116339628 | MET    | p.Pro164Ser  | C/T |                                               | 60,9    | 940  | 0,05 | missense_variant   | 0 of 6 Predicted as Damaging |
| 261Ad | 7  | 116340177 | MET    | p.Ala347Thr  | G/A |                                               | 46,0    | 142  | 0,09 | missense_variant   | 5 of 6 Predicted as Damaging |
| 689Ad | 7  | 116340189 | MET    | p.Pro351Ser  | C/T |                                               | 45,0    | 420  | 0,06 | missense_variant   | 5 of 6 Predicted as Damaging |
| 260Ad | 7  | 116340210 | MET    | p.Asp358Asn  | G/A |                                               | 40,0    | 867  | 0,05 | missense_variant   | 0 of 6 Predicted as Damaging |
| 689Ad | 7  | 116340210 | MET    | p.Asp358Asn  | G/A |                                               | 58,3    | 420  | 0,07 | missense_variant   | 0 of 6 Predicted as Damaging |
| 258Ad | 7  | 116411990 | MET    | p.Thr1010Ile | C/T | 707                                           | 13037,4 | 1992 | 0,59 | missense_variant   | 4 of 6 Predicted as Damaging |
| 260Ad | 7  | 116423432 | MET    | p.Ser1254Asn | G/A |                                               | 84,5    | 1908 | 0,05 | missense_variant   | 4 of 6 Predicted as Damaging |
| 256Ad | 7  | 140453136 | BRAF   | p.Val600Glu  | A/T | 476                                           | 31,1    | 375  | 0,05 | missense_variant   | 5 of 6 Predicted as Damaging |
| 101Ad | 7  | 140481402 | BRAF   | p.Gly469Glu  | C/T | 461                                           | 83,1    | 1632 | 0,05 | missense_variant   | 6 of 6 Predicted as Damaging |
| 261Ad | 7  | 140481408 | BRAF   | p.Ser467Leu  | G/A | 27911                                         | 38,2    | 215  | 0,07 | missense_variant   | 5 of 6 Predicted as Damaging |
| 689Ad | 7  | 140481408 | BRAF   | p.Ser467Leu  | G/A | 27911                                         | 238,8   | 382  | 0,14 | missense_variant   | 5 of 6 Predicted as Damaging |
| 151Ad | 7  | 140481433 | BRAF   | p.Val459Met  | C/T |                                               | 137,0   | 573  | 0,09 | missense_variant   | 3 of 6 Predicted as Damaging |
| 260Ad | 7  | 140481444 | BRAF   | p.Gly455Glu  | C/T | 1162152                                       | 86,0    | 430  | 0,08 | missense_variant   | 3 of 6 Predicted as Damaging |
| 260Ad | 7  | 140481448 | BRAF   | p.Asp454Asn  | C/T |                                               | 108,4   | 430  | 0,09 | missense_variant   | 3 of 6 Predicted as Damaging |
| 249Ad | 7  | 140481489 | BRAF   | p.Thr440Ile  | G/A |                                               | 46,7    | 754  | 0,05 | missense_variant   | 2 of 6 Predicted as Damaging |
| 101Ad | 8  | 38282143  | FGFR1  | p.Glu305Lys  | C/T |                                               | 77,3    | 655  | 0,06 | missense_variant   | 4 of 6 Predicted as Damaging |
| 261Ad | 8  | 38282146  | FGFR1  | p.Val304Met  | C/T |                                               | 147,0   | 78   | 0,27 | missense_variant   | 5 of 6 Predicted as Damaging |
| 101Ad | 8  | 38282160  | FGFR1  | p.Ala299Val  | G/A |                                               | 81,8    | 656  | 0,07 | missense_variant   | 2 of 6 Predicted as Damaging |
| 151Ad | 8  | 38282184  | FGFR1  | p.Gly291Glu  | C/T |                                               | 65,8    | 646  | 0,06 | missense_variant   | 5 of 6 Predicted as Damaging |
| 260Ad | 8  | 38282188  | FGFR1  | p.Ala290Thr  | C/T |                                               | 228,1   | 455  | 0,13 | missense_variant   | 5 of 6 Predicted as Damaging |
| 151Ad | 8  | 38282208  | FGFR1  | p.Pro283Leu  | G/A |                                               | 70,1    | 642  | 0,06 | missense_variant   | 6 of 6 Predicted as Damaging |
| 260Ad | 8  | 38285875  | FGFR1  | p.Pro179Leu  | G/A |                                               | 121,1   | 121  | 0,18 | missense_variant   | 4 of 6 Predicted as Damaging |
| 101Ad | 8  | 38285881  | FGFR1  | p.Thr177Ile  | G/A |                                               | 158,8   | 351  | 0,12 | missense_variant   | 3 of 6 Predicted as Damaging |
| 101Ad | 8  | 38285945  | FGFR1  | p.Pro156Ser  | G/A | 3648909,3648910,3648911,3648912,3648913,36489 | 119,4   | 536  | 0,08 | missense_variant   | 5 of 6 Predicted as Damaging |
| 260Ad | 9  | 139399351 | NOTCH1 | p.Arg1598Cys | G/A |                                               | 100,2   | 360  | 0,09 | missense_variant   | 5 of 6 Predicted as Damaging |
| 689Ad | 9  | 139399362 | NOTCH1 | p.Arg1594Gln | C/T | 136758,136759                                 | 68,5    | 286  | 0,08 | missense_variant   | 5 of 6 Predicted as Damaging |
| 679Ad | 9  | 139399363 | NOTCH1 | p.Arg1594Trp | C/T |                                               | 6016,6  | 3414 | 0,36 | missense_variant   | 6 of 6 Predicted as Damaging |
| 151Ad | 10 | 89685277  | PTEN   | p.Asp58Asn   | G/A | 1166806                                       | 41,0    | 985  | 0,05 | missense_variant   | 4 of 6 Predicted as Damaging |
| 100Ad | 10 | 89685289  | PTEN   | p.Asn63fs    | A/- | 5811,5836,86071                               | 1780,4  | 932  | 0,29 | frameshift_variant |                              |
| 689Ad | 10 | 89711900  | PTEN   | p.Arg173His  | G/A | 5039                                          | 110,6   | 548  | 0,08 | missense_variant   | 6 of 6 Predicted as Damaging |
| 680Ad | 10 | 89717672  | PTEN   | p.Arg233Ter  | C/T | 5154                                          | 5694,0  | 2112 | 0,35 | stop_gained        | 2 of 6 Predicted as Damaging |
| 261Ad | 10 | 89717675  | PTEN   | p.Arg234Trp  | C/T | 5118                                          | 93,2    | 382  | 0,09 | missense_variant   | 5 of 6 Predicted as Damaging |
| 689Ad | 10 | 89717681  | PTEN   | p.Asp236Asn  | G/A |                                               | 155,1   | 734  | 0,08 | missense_variant   | 3 of 6 Predicted as Damaging |
| 101Ad | 10 | 89717727  | PTEN   | p.Gly251Asp  | G/A | 13981                                         | 101,5   | 1843 | 0,05 | missense_variant   | 6 of 6 Predicted as Damaging |
| 101Ad | 10 | 89720805  | PTEN   | p.Thr319Ile  | C/T |                                               | 58,2    | 1020 | 0,06 | missense_variant   | 4 of 6 Predicted as Damaging |
| 101Ad | 10 | 89720864  | PTEN   | p.Pro339Ser  | C/T | 23657                                         | 71,4    | 1022 | 0,05 | missense_variant   | 5 of 6 Predicted as Damaging |
| 689Ad | 10 | 123258023 | FGFR2  | p.Ala554Val  | G/A |                                               | 103,9   | 641  | 0,07 | missense_variant   | 4 of 6 Predicted as Damaging |
| 261Ad | 10 | 123258030 | FGFR2  | p.Leu552Phe  | G/A |                                               | 66,2    | 487  | 0,07 | missense_variant   | 5 of 6 Predicted as Damaging |
| 151Ad | 10 | 123258033 | FGFR2  | p.Leu551Phe  | G/A |                                               | 51,7    | 1016 | 0,05 | missense_variant   | 5 of 6 Predicted as Damaging |
| 689Ad | 10 | 123274745 | FGFR2  | p.Met392Ile  | C/T |                                               | 202,6   | 80   | 0,33 | missense_variant   | 3 of 6 Predicted as Damaging |
| 261Ad | 10 | 123274752 | FGFR2  | p.Ala390Val  | G/A |                                               | 126,8   | 63   | 0,29 | missense_variant   | 2 of 6 Predicted as Damaging |
| 101Ad | 10 | 123274773 | FGFR2  | p.Cys383Tyr  | C/T | 1346257,915493,915494,915495                  | 34,3    | 604  | 0,05 | missense_variant   | 6 of 6 Predicted as Damaging |
| 100Ad | 10 | 123274828 | FGFR2  | p.Gly365Arg  | C/T |                                               | 47,4    | 481  | 0,06 | missense_variant   | 2 of 6 Predicted as Damaging |
| 101Ad | 10 | 123274830 | FGFR2  | p.Pro364Leu  | G/A |                                               | 60,9    | 601  | 0,06 | missense_variant   | 4 of 6 Predicted as Damaging |
| 249Ad | 10 | 123279498 | FGFR2  | p.Leu312Phe  | G/A |                                               | 32,3    | 565  | 0,05 | missense_variant   | 5 of 6 Predicted as Damaging |
| 260Ad | 10 | 123279507 | FGFR2  | p.Leu309Phe  | G/A |                                               | 140,9   | 409  | 0,10 | missense_variant   | 4 of 6 Predicted as Damaging |
| 689Ad | 10 | 123279507 | FGFR2  | p.Leu309Phe  | G/A |                                               | 226,1   | 315  | 0,15 | missense_variant   | 4 of 6 Predicted as Damaging |
| 689Ad | 10 | 123279618 | FGFR2  | p.Gly272Arg  | C/T |                                               | 52,9    | 200  | 0,09 | missense_variant   | 5 of 6 Predicted as Damaging |
| 260Ad | 10 | 123279645 | FGFR2  | p.Pro263Ser  | G/A |                                               | 57,7    | 376  | 0,07 | missense_variant   | 6 of 6 Predicted as Damaging |
| 101Ad | 10 | 123279650 | FGFR2  | p.Gly261Glu  | C/T |                                               | 89,9    | 503  | 0,08 | missense_variant   | 6 of 6 Predicted as Damaging |
| 101Ad | 10 | 123279680 | FGFR2  | p.Arg251Gln  | C/T | 29828,3434789,3434790,3434791                 | 44,4    | 501  | 0,06 | missense_variant   | 5 of 6 Predicted as Damaging |
| 674Ad | 10 | 123279681 | FGFR2  | p.Arg251Ter  | G/A | 1346299,1346300,1346301,1346302               | 926,4   | 1002 | 0,18 | stop_gained        | 2 of 6 Predicted as Damaging |
| 670Ad | 12 | 25378562  | KRAS   | p.Ala146Thr  | C/T | 1165198,19404                                 | 141,5   | 442  | 0,10 | missense_variant   | 6 of 6 Predicted as Damaging |
| 686Ad | 12 | 25378562  | KRAS   | p.Ala146Thr  | C/T | 1165198,19404                                 | 5895,2  | 1381 | 0,45 | missense_variant   | 6 of 6 Predicted as Damaging |
| 695Ad | 12 | 25378562  | KRAS   | p.Ala146Thr  | C/T | 1165198,19404                                 | 1344,3  | 1462 | 0,18 | missense_variant   | 6 of 6 Predicted as Damaging |
| 261Ad | 12 | 25378586  | KRAS   | p.Gly138Arg  | C/T |                                               | 64,1    | 325  | 0,08 | missense_variant   | 6 of 6 Predicted as Damaging |
| 264Ad | 12 | 25378586  | KRAS   | p.Gly138Arg  | C/T |                                               | 40,8    | 63   | 0,13 | missense_variant   | 6 of 6 Predicted as Damaging |
| 260Ad | 12 | 25378618  | KRAS   | p.Thr127Ile  | G/A |                                               | 110,1   | 981  | 0,06 | missense_variant   | 3 of 6 Predicted as Damaging |
| 151Ad | 12 | 25378622  | KRAS   | p.Asp126Asn  | C/T |                                               | 51,3    | 690  | 0,05 | missense_variant   | 2 of 6 Predicted as Damaging |
| 261Ad | 12 | 25380274  | KRAS   | p.Glu62Lys   | C/T | 3459505,3459506                               | 71,4    | 687  | 0,06 | missense_variant   | 6 of 6 Predicted as Damaging |
| 261Ad | 12 | 25380279  | KRAS   | p.Gly60Asp   | C/T | 87290                                         | 62,8    | 689  | 0,06 | missense_variant   | 6 of 6 Predicted as Damaging |
| 689Ad | 12 | 25380319  | KRAS   | p.Asp47Asn   | C/T |                                               | 50,1    | 779  | 0,05 | missense_variant   | 3 of 6 Predicted as Damaging |

|       |    |          |        |             |     |                                               |        |      |      |                    |                              |
|-------|----|----------|--------|-------------|-----|-----------------------------------------------|--------|------|------|--------------------|------------------------------|
| 101Ad | 12 | 25380325 | KRAS   | p.Val45Ile  | C/T |                                               | 80,9   | 2221 | 0,05 | missense_variant   | 3 of 6 Predicted as Damaging |
| 169Ad | 12 | 25398281 | KRAS   | p.Gly13Asp  | C/T | 1140132,532                                   | 6422,7 | 2294 | 0,37 | missense_variant   | 6 of 6 Predicted as Damaging |
| 170Ad | 12 | 25398281 | KRAS   | p.Gly13Asp  | C/T | 1140132,532                                   | 1497,0 | 687  | 0,29 | missense_variant   | 6 of 6 Predicted as Damaging |
| 171Ad | 12 | 25398281 | KRAS   | p.Gly13Asp  | C/T | 1140132,532                                   | 1153,9 | 2641 | 0,14 | missense_variant   | 6 of 6 Predicted as Damaging |
| 270Ad | 12 | 25398281 | KRAS   | p.Gly13Asp  | C/T | 1140132,532                                   | 52,8   | 809  | 0,05 | missense_variant   | 6 of 6 Predicted as Damaging |
| 106Ad | 12 | 25398284 | KRAS   | p.Gly12Asp  | C/T | 1135366,521                                   | 1016,4 | 825  | 0,21 | missense_variant   | 4 of 6 Predicted as Damaging |
| 248Ad | 12 | 25398284 | KRAS   | p.Gly12Asp  | C/T | 1135366,521                                   | 194,6  | 1555 | 0,07 | missense_variant   | 4 of 6 Predicted as Damaging |
| 249Ad | 12 | 25398284 | KRAS   | p.Gly12Val  | C/A | 1140133,520                                   | 258,1  | 1316 | 0,08 | missense_variant   | 4 of 6 Predicted as Damaging |
| 260Ad | 12 | 25398284 | KRAS   | p.Gly12Asp  | C/T | 1135366,521                                   | 41,8   | 951  | 0,05 | missense_variant   | 4 of 6 Predicted as Damaging |
| 264Ad | 12 | 25398284 | KRAS   | p.Gly12Val  | C/A | 1140133,520                                   | 115,9  | 55   | 0,29 | missense_variant   | 4 of 6 Predicted as Damaging |
| 260Ad | 12 | 25398300 | KRAS   | p.Val7Met   | C/T | 30620                                         | 71,2   | 944  | 0,06 | missense_variant   | 6 of 6 Predicted as Damaging |
| 249Ad | 15 | 66727414 | MAP2K1 | p.Glu44Lys  | G/A |                                               | 30,9   | 382  | 0,05 | missense_variant   | 6 of 6 Predicted as Damaging |
| 260Ad | 15 | 66727423 | MAP2K1 | p.Arg47Ter  | C/T |                                               | 44,2   | 400  | 0,06 | stop_gained        | 2 of 6 Predicted as Damaging |
| 101Ad | 15 | 66727462 | MAP2K1 | p.Val60Met  | G/A |                                               | 36,4   | 531  | 0,05 | missense_variant   | 5 of 6 Predicted as Damaging |
| 151Ad | 15 | 66727462 | MAP2K1 | p.Val60Met  | G/A |                                               | 103,0  | 492  | 0,08 | missense_variant   | 5 of 6 Predicted as Damaging |
| 101Ad | 15 | 66727522 | MAP2K1 | p.Gly80Ser  | G/A |                                               | 30,2   | 526  | 0,05 | missense_variant   | 4 of 6 Predicted as Damaging |
| 689Ad | 17 | 7573937  | TP53   | p.Ala364Thr | C/T | 46361                                         | 59,6   | 559  | 0,06 | missense_variant   | 2 of 6 Predicted as Damaging |
| 260Ad | 17 | 7573967  | TP53   | p.Gln354Ter | G/A | 562344,562345                                 | 76,0   | 685  | 0,06 | stop_gained        | 2 of 6 Predicted as Damaging |
| 689Ad | 17 | 7573970  | TP53   | p.Ala353Thr | C/T | 45292                                         | 102,3  | 560  | 0,08 | missense_variant   | 3 of 6 Predicted as Damaging |
| 261Ad | 17 | 7574008  | TP53   | p.Met340Thr | A/G |                                               | 31,3   | 226  | 0,06 | missense_variant   | 5 of 6 Predicted as Damaging |
| 101Ad | 17 | 7574030  | TP53   | p.Arg333Cys | G/A |                                               | 158,1  | 959  | 0,08 | missense_variant   | 6 of 6 Predicted as Damaging |
| 261Ad | 17 | 7574030  | TP53   | p.Arg333Cys | G/A |                                               | 145,9  | 225  | 0,14 | missense_variant   | 6 of 6 Predicted as Damaging |
| 689Ad | 17 | 7577021  | TP53   | p.Arg306Gln | C/T |                                               | 182,4  | 178  | 0,19 | missense_variant   | 6 of 6 Predicted as Damaging |
| 689Ad | 17 | 7577058  | TP53   | p.Glu294Lys | C/T | 44127                                         | 113,8  | 178  | 0,14 | missense_variant   | 1 of 6 Predicted as Damaging |
| 680Ad | 17 | 7577069  | TP53   | p.Arg290His | C/T | 1386594,44017                                 | 489,7  | 1329 | 0,11 | missense_variant   | 2 of 6 Predicted as Damaging |
| 100Ad | 17 | 7577091  | TP53   | p.Arg283Cys | G/A | 10911                                         | 43,3   | 378  | 0,06 | missense_variant   | 6 of 6 Predicted as Damaging |
| 249Ad | 17 | 7577094  | TP53   | p.Arg282Trp | G/A | 10704,1636702,3378339,99925                   | 35,6   | 382  | 0,06 | missense_variant   | 6 of 6 Predicted as Damaging |
| 689Ad | 17 | 7577102  | TP53   | p.Gly279Val | C/A | 46032                                         | 114,1  | 178  | 0,14 | missense_variant   | 6 of 6 Predicted as Damaging |
| 170Ad | 17 | 7577103  | TP53   | p.Gly279Arg | C/T | 44603                                         | 942,0  | 429  | 0,30 | missense_variant   | 6 of 6 Predicted as Damaging |
| 689Ad | 17 | 7577112  | TP53   | p.Ala276Thr | C/T | 44114                                         | 46,0   | 179  | 0,08 | missense_variant   | 6 of 6 Predicted as Damaging |
| 685Ad | 17 | 7577121  | TP53   | p.Arg273Cys | G/A | 10659,1645518,3355991,99933                   | 1328,8 | 765  | 0,26 | missense_variant   | 6 of 6 Predicted as Damaging |
| 689Ad | 17 | 7577142  | TP53   | p.Gly266Arg | C/T | 10794,1559475,1645293,3388175                 | 113,5  | 178  | 0,14 | missense_variant   | 6 of 6 Predicted as Damaging |
| 249Ad | 17 | 7577532  | TP53   | p.Pro250Leu | G/A | 10771,1646862,212111,212112,3378345           | 50,6   | 1251 | 0,05 | missense_variant   | 6 of 6 Predicted as Damaging |
| 249Ad | 17 | 7577551  | TP53   | p.Gly244Ser | C/T | 10941,1716873,3355992,984898,984900,984901    | 69,5   | 1250 | 0,05 | missense_variant   | 6 of 6 Predicted as Damaging |
| 689Ad | 17 | 7577556  | TP53   | p.Cys242Trp | C/T | 10646,251396,251397,251398,2744612,3403262    | 223,9  | 544  | 0,11 | missense_variant   | 6 of 6 Predicted as Damaging |
| 101Ad | 17 | 7577599  | TP53   | p.Asp228Asn | C/T | 44398                                         | 140,9  | 1613 | 0,06 | missense_variant   | 4 of 6 Predicted as Damaging |
| 671Ad | 17 | 7578184  | TP53   | p.Pro222Leu | G/A | 44606                                         | 4105,3 | 1848 | 0,30 | missense_variant   | 5 of 6 Predicted as Damaging |
| 100Ad | 17 | 7578188  | TP53   | p.Glu221Lys | C/T | 44853                                         | 41,5   | 879  | 0,05 | missense_variant   | 6 of 6 Predicted as Damaging |
| 151Ad | 17 | 7578223  | TP53   | p.Arg209Lys | C/T | 308314,308315,308316,308317,45995             | 62,3   | 928  | 0,05 | missense_variant   | 1 of 6 Predicted as Damaging |
| 151Ad | 17 | 7578239  | TP53   | p.Glu204Lys | C/T | 43990                                         | 62,7   | 925  | 0,05 | missense_variant   | 1 of 6 Predicted as Damaging |
| 151Ad | 17 | 7578253  | TP53   | p.Gly199Glu | C/T | 43989                                         | 90,0   | 924  | 0,06 | missense_variant   | 6 of 6 Predicted as Damaging |
| 101Ad | 17 | 7578262  | TP53   | p.Arg196Gln | C/T | 1386755,1386756,1386757,1386758,44599         | 42,3   | 992  | 0,05 | missense_variant   | 6 of 6 Predicted as Damaging |
| 260Ad | 17 | 7578262  | TP53   | p.Arg196Gln | C/T | 1386755,1386756,1386757,1386758,44599         | 136,2  | 853  | 0,07 | missense_variant   | 6 of 6 Predicted as Damaging |
| 101Ad | 17 | 7578277  | TP53   | p.Pro191Leu | G/A | 3890517,3890518,3890519,3890520,3890521,38905 | 571,3  | 988  | 0,06 | missense_variant   | 6 of 6 Predicted as Damaging |
| 261Ad | 17 | 7578392  | TP53   | p.Glu180Lys | C/T | 1522501,1522502,1522503,1522504,43772         | 201,9  | 99   | 0,27 | missense_variant   | 5 of 6 Predicted as Damaging |
| 686Ad | 17 | 7578392  | TP53   | p.Glu180Lys | C/T | 1522501,1522502,1522503,1522504,43772         | 102,0  | 1515 | 0,05 | missense_variant   | 5 of 6 Predicted as Damaging |
| 101Ad | 17 | 7578428  | TP53   | p.His168Tyr | G/A | 43861                                         | 131,4  | 1082 | 0,07 | missense_variant   | 4 of 6 Predicted as Damaging |
| 168Ad | 17 | 7578464  | TP53   | p.Arg156Cys | G/A | 3403271,3403272,3403273,3403274,3403275,34032 | 710,9  | 482  | 0,23 | missense_variant   | 2 of 6 Predicted as Damaging |
| 169Ad | 17 | 7578464  | TP53   | p.Arg156Cys | G/A | 3403271,3403272,3403273,3403274,3403275,34032 | 5800,7 | 2066 | 0,35 | missense_variant   | 2 of 6 Predicted as Damaging |
| 101Ad | 17 | 7579377  | TP53   | p.Gln104Ter | G/A | 10886,2745029,308171,308172,3727867           | 37,7   | 415  | 0,06 | stop_gained        | 2 of 6 Predicted as Damaging |
| 101Ad | 17 | 7579400  | TP53   | p.Ser96Phe  | G/A | 44447                                         | 55,5   | 413  | 0,07 | missense_variant   | 1 of 6 Predicted as Damaging |
| 151Ad | 17 | 7579419  | TP53   | p.Ser90Pro  | A/G |                                               | 39,3   | 248  | 0,08 | missense_variant   | 2 of 6 Predicted as Damaging |
| 689Ad | 17 | 7579433  | TP53   | p.Pro85Leu  | G/A | 45837                                         | 73,5   | 73   | 0,18 | missense_variant   | 3 of 6 Predicted as Damaging |
| 252Ad | 17 | 7579472  | TP53   | p.Val73fs   | -/C |                                               | 119,9  | 133  | 0,34 | frameshift_variant |                              |
| 151Ad | 17 | 7579476  | TP53   | p.Pro71Ser  | G/A |                                               | 3108,9 | 248  | 0,15 | missense_variant   | 1 of 6 Predicted as Damaging |
| 151Ad | 17 | 7579864  | TP53   | p.Glu17Lys  | C/T |                                               | 233,0  | 508  | 0,12 | missense_variant   | 6 of 6 Predicted as Damaging |
| 689Ad | 17 | 7579879  | TP53   | p.Pro12Ser  | G/A |                                               | 292,2  | 433  | 0,15 | missense_variant   | 3 of 6 Predicted as Damaging |
| 151Ad | 17 | 7579887  | TP53   | p.Ser9Asn   | C/T |                                               | 78,2   | 510  | 0,07 | missense_variant   | 2 of 6 Predicted as Damaging |
| 261Ad | 17 | 7579896  | TP53   | p.Ser6Leu   | G/A |                                               | 138,9  | 140  | 0,18 | missense_variant   | 2 of 6 Predicted as Damaging |
| 689Ad | 17 | 37880216 | ERBB2  | p.Val754Met | G/A |                                               | 101,0  | 225  | 0,12 | missense_variant   | 4 of 6 Predicted as Damaging |
| 101Ad | 17 | 37880223 | ERBB2  | p.Arg756Lys | G/A |                                               | 303,3  | 865  | 0,11 | missense_variant   | 4 of 6 Predicted as Damaging |
| 265Ad | 17 | 37881332 | ERBB2  | p.Val842Ile | G/A | 14065                                         | 1175,2 | 544  | 0,29 | missense_variant   | 5 of 6 Predicted as Damaging |
| 266Ad | 17 | 37881332 | ERBB2  | p.Val842Ile | G/A | 14065                                         | 3120,3 | 1184 | 0,33 | missense_variant   | 5 of 6 Predicted as Damaging |
| 249Ad | 17 | 37881347 | ERBB2  | p.Ala847Thr | G/A |                                               | 33,8   | 469  | 0,05 | missense_variant   | 5 of 6 Predicted as Damaging |
| 261Ad | 17 | 37881408 | ERBB2  | p.Ala867Val | C/T |                                               | 86,3   | 81   | 0,19 | missense_variant   | 4 of 6 Predicted as Damaging |
| 151Ad | 17 | 37881439 | ERBB2  | p.Tyr871Ter | C/G |                                               | 49,0   | 762  | 0,05 | stop_gained        | 2 of 6 Predicted as Damaging |
| 689Ad | 17 | 37881444 | ERBB2  | p.Ala879Val | C/T |                                               | 72,8   | 376  | 0,08 | missense_variant   | 5 of 6 Predicted as Damaging |
| 247Ad | 17 | 37881446 | ERBB2  | p.Asp880Asn | G/A |                                               | 32,2   | 151  | 0,07 | missense_variant   | 4 of 6 Predicted as Damaging |
| 101Ad | 17 | 37881450 | ERBB2  | p.Gly881Glu | G/A |                                               | 156,1  | 924  | 0,05 | missense_variant   | 5 of 6 Predicted as Damaging |
| 689Ad | 17 | 37881452 | ERBB2  | p.Gly882Ser | G/A |                                               | 62,3   | 454  | 0,07 | missense_variant   | 4 of 6 Predicted as Damaging |
| 689Ad | 17 | 37881453 | ERBB2  | p.Gly882Asp | G/A |                                               | 113,5  | 456  | 0,09 | missense_variant   | 4 of 6 Predicted as Damaging |
| 261Ad | 18 | 48575103 | SMAD4  | p.Trp99Ter  | G/A |                                               | 34,8   | 600  | 0,05 | stop_gained        | 2 of 6 Predicted as Damaging |
| 151Ad | 18 | 48575111 | SMAD4  | p.Pro102Leu | C/T | 14088                                         | 99,5   | 1170 | 0,06 | missense_variant   | 5 of 6 Predicted as Damaging |
| 264Ad | 18 | 48575111 | SMAD4  | p.Pro102Leu | C/T | 14088                                         | 78,9   | 78   | 0,18 | missense_variant   | 5 of 6 Predicted as Damaging |
| 261Ad | 18 | 48575159 | SMAD4  | p.Ala118Val | C/T | 14215                                         | 41,0   | 605  | 0,05 | missense_variant   | 5 of 6 Predicted as Damaging |
| 689Ad | 18 | 48575180 | SMAD4  | p.Ser125Asn | G/A |                                               | 130,4  | 618  | 0,08 | missense_variant   | 2 of 6 Predicted as Damaging |
| 689Ad | 18 | 48575194 | SMAD4  | p.Pro130Ser | C/T | 33139                                         | 66,4   | 618  | 0,06 | missense_variant   | 6 of 6 Predicted as Damaging |
| 260Ad | 18 | 48581217 | SMAD4  | p.Thr174Ile | C/T |                                               | 57,6   | 1338 | 0,05 | missense_variant   | 3 of 6 Predicted as Damaging |
| 260Ad | 18 | 48581223 | SMAD4  | p.Gly176Glu | G/A |                                               | 65,8   | 1342 | 0,05 | missense_variant   | 3 of 6 Predicted as Damaging |
| 260Ad | 18 | 48581271 | SMAD4  | p.Thr192Ile | C/T |                                               | 100,2  | 1344 | 0,06 | missense_variant   | 3 of 6 Predicted as Damaging |
| 260Ad | 18 | 48581288 | SMAD4  | p.Pro198Thr | C/A |                                               | 3014,2 | 1339 | 0,30 | missense_variant   | 3 of 6 Predicted as Damaging |
| 263Ad | 18 | 48581288 | SMAD4  | p.Pro198Thr | C/A |                                               | 3310,2 | 1088 | 0,36 | missense_variant   | 3 of 6 Predicted as Damaging |
| 101Ad | 18 | 48581301 | SMAD4  | p.Ala202Val | C/T |                                               | 83,5   | 1304 | 0,05 | missense_variant   | 3 of 6 Predicted as Damaging |
| 272Ad | 18 | 48584558 | SMAD4  | p.Pro244His | C/A |                                               | 2625,9 | 950  | 0,34 | missense_variant   | 3 of 6 Predicted as Damaging |
| 151Ad | 18 | 48584577 | SMAD4  | p.Gln250His | G/C |                                               | 107,4  | 669  | 0,07 | missense_variant   | 2 of 6 Predicted as Damaging |
| 101Ad | 18 | 48584588 | SMAD4  | p.Thr254Ile | C/T |                                               | 42,5   | 759  | 0,05 | missense_variant   | 2 of 6 Predicted as Damaging |
| 261Ad | 18 | 48584597 | SMAD4  | p.Pro257Leu | C/T |                                               | 239,6  | 164  | 0,23 | missense_variant   | 3 of 6 Predicted as Damaging |
| 260Ad | 18 | 48586259 | SMAD4  | p.Phe310Leu | T/C | 1324558                                       | 112,4  | 852  | 0,07 | missense_variant   | 3 of 6 Predicted as Damaging |
| 689Ad | 18 | 48586269 | SMAD4  | p.Pro313Leu | C/T |                                               | 84,8   | 459  | 0,08 | missense_variant   | 4 of 6 Predicted as Damaging |
| 689Ad | 18 | 48591858 | SMAD4  | p.Val341Ile | G/A |                                               | 204,8  | 530  | 0,11 | missense_variant   | 5 of 6 Predicted as Damaging |
| 264Ad | 18 | 48591862 | SMAD4  | p.Pro342Leu | C/T |                                               | 38,5   | 69   | 0,12 | missense_variant   | 5 of 6 Predicted as Damaging |
| 689Ad | 18 | 48591892 | SMAD4  | p.Gly352Glu | G/A |                                               | 214,6  | 532  | 0,11 | missense_variant   | 6 of 6 Predicted as Damaging |

|       |    |          |       |             |     |         |        |      |      |                  |                              |
|-------|----|----------|-------|-------------|-----|---------|--------|------|------|------------------|------------------------------|
| 169Ad | 18 | 48591919 | SMAD4 | p.Arg361His | G/A | 14122   | 5667,7 | 3134 | 0,35 | missense_variant | 6 of 6 Predicted as Damaging |
| 689Ad | 18 | 48591919 | SMAD4 | p.Arg361His | G/A | 14122   | 273,7  | 529  | 0,13 | missense_variant | 6 of 6 Predicted as Damaging |
| 689Ad | 18 | 48593421 | SMAD4 | p.Cys391Tyr | G/A |         | 32,4   | 269  | 0,06 | missense_variant | 4 of 6 Predicted as Damaging |
| 685Ad | 18 | 48593465 | SMAD4 | p.Ala406Thr | G/A | 14103   | 3440,8 | 1140 | 0,36 | missense_variant | 6 of 6 Predicted as Damaging |
| 689Ad | 18 | 48593502 | SMAD4 | p.Ala418Val | C/T |         | 50,9   | 271  | 0,07 | missense_variant | 5 of 6 Predicted as Damaging |
| 261Ad | 18 | 48593505 | SMAD4 | p.Gly419Glu | G/A |         | 83,4   | 88   | 0,17 | missense_variant | 6 of 6 Predicted as Damaging |
| 261Ad | 18 | 48603057 | SMAD4 | p.Thr453Ile | C/T |         | 39,5   | 944  | 0,05 | missense_variant | 5 of 6 Predicted as Damaging |
| 247Ad | 18 | 48604659 | SMAD4 | p.Asp494Gly | A/G | 84443   | 58,1   | 143  | 0,10 | missense_variant | 6 of 6 Predicted as Damaging |
| 684Ad | 18 | 48604659 | SMAD4 | p.Asp494Gly | A/G | 84443   | 31,6   | 130  | 0,08 | missense_variant | 6 of 6 Predicted as Damaging |
| 260Ad | 18 | 48604665 | SMAD4 | p.Arg496His | G/A | 14193   | 125,6  | 573  | 0,08 | missense_variant | 6 of 6 Predicted as Damaging |
| 101Ad | 18 | 48604667 | SMAD4 | p.Arg497Cys | C/T |         | 39,7   | 753  | 0,05 | missense_variant | 6 of 6 Predicted as Damaging |
| 101Ad | 18 | 48604668 | SMAD4 | p.Arg497His | G/A | 14113   | 33,6   | 755  | 0,05 | missense_variant | 5 of 6 Predicted as Damaging |
| 260Ad | 18 | 48604683 | SMAD4 | p.Arg502Lys | G/A | 1389093 | 88,8   | 573  | 0,07 | missense_variant | 5 of 6 Predicted as Damaging |
| 260Ad | 18 | 48604689 | SMAD4 | p.Ser504Asn | G/A |         | 34,7   | 571  | 0,05 | missense_variant | 5 of 6 Predicted as Damaging |
| 249Ad | 18 | 48604718 | SMAD4 | p.Pro514Ser | C/T | 1711346 | 36,4   | 699  | 0,05 | missense_variant | 4 of 6 Predicted as Damaging |
| 260Ad | 18 | 48604750 | SMAD4 | p.Trp524Ter | G/A |         | 35,1   | 569  | 0,05 | stop_gained      | 2 of 6 Predicted as Damaging |
| 261Ad | 18 | 48604754 | SMAD4 | p.Glu526Lys | G/A | 1151656 | 282,7  | 76   | 0,42 | missense_variant | 6 of 6 Predicted as Damaging |
| 260Ad | 19 | 1207009  | STK11 | p.Glu33Lys  | G/A |         | 131,5  | 594  | 0,08 | missense_variant | 4 of 6 Predicted as Damaging |
| 689Ad | 19 | 1207069  | STK11 | p.Asp53Asn  | G/A |         | 104,2  | 1015 | 0,06 | missense_variant | 5 of 6 Predicted as Damaging |
| 689Ad | 19 | 1207079  | STK11 | p.Gly56Glu  | G/A |         | 61,0   | 1014 | 0,05 | missense_variant | 6 of 6 Predicted as Damaging |
| 101Ad | 19 | 1220496  | STK11 | p.Val197Met | G/A |         | 311,6  | 1119 | 0,10 | missense_variant | 4 of 6 Predicted as Damaging |
| 260Ad | 19 | 1220589  | STK11 | p.Pro203Ser | C/T |         | 87,8   | 341  | 0,09 | missense_variant | 3 of 6 Predicted as Damaging |
| 260Ad | 19 | 1220595  | STK11 | p.Ala205Thr | G/A | 20953   | 139,3  | 340  | 0,11 | missense_variant | 3 of 6 Predicted as Damaging |
| 165Ad | 19 | 1221246  | STK11 | p.Gly257Arg | G/A |         | 32,9   | 118  | 0,08 | missense_variant | 6 of 6 Predicted as Damaging |
| 260Ad | 19 | 1223025  | STK11 | p.Pro321Leu | C/T |         | 65,9   | 523  | 0,07 | missense_variant | 6 of 6 Predicted as Damaging |
| 260Ad | 19 | 1223039  | STK11 | p.Pro326Ser | C/T |         | 109,6  | 529  | 0,08 | missense_variant | 2 of 6 Predicted as Damaging |
| 101Ad | 19 | 1223040  | STK11 | p.Pro326Leu | C/T |         | 45,2   | 933  | 0,05 | missense_variant | 3 of 6 Predicted as Damaging |
| 101Ad | 19 | 1223046  | STK11 | p.Thr328Ile | C/T |         | 122,9  | 938  | 0,07 | missense_variant | 2 of 6 Predicted as Damaging |
| 260Ad | 19 | 1223046  | STK11 | p.Thr328Ile | C/T |         | 98,8   | 529  | 0,08 | missense_variant | 2 of 6 Predicted as Damaging |
| 689Ad | 19 | 1223051  | STK11 | p.Asp330Asn | G/A |         | 97,7   | 387  | 0,09 | missense_variant | 4 of 6 Predicted as Damaging |
| 689Ad | 19 | 1223058  | STK11 | p.Trp332Ter | G/A |         | 197,9  | 388  | 0,13 | stop_gained      | 2 of 6 Predicted as Damaging |
| 687Ad | 19 | 1223061  | STK11 | p.Arg333His | G/A |         | 850,6  | 1308 | 0,15 | missense_variant | 3 of 6 Predicted as Damaging |
| 689Ad | 19 | 1223061  | STK11 | p.Arg333His | G/A |         | 596,5  | 388  | 0,24 | missense_variant | 3 of 6 Predicted as Damaging |
| 249Ad | 19 | 1223096  | STK11 | p.His345Tyr | C/T |         | 30,2   | 526  | 0,05 | missense_variant | 2 of 6 Predicted as Damaging |
| 101Ad | 19 | 1223108  | STK11 | p.Glu349Lys | G/A |         | 73,3   | 982  | 0,05 | missense_variant | 1 of 6 Predicted as Damaging |
| 101Ad | 19 | 1223111  | STK11 | p.Asp350Asn | G/A | 1390434 | 52,0   | 985  | 0,05 | missense_variant | 2 of 6 Predicted as Damaging |
| 101Ad | 19 | 1223117  | STK11 | p.Asp352Asn | G/A |         | 41,6   | 997  | 0,05 | missense_variant | 3 of 6 Predicted as Damaging |
| 689Ad | 19 | 1223117  | STK11 | p.Asp352Asn | G/A |         | 105,0  | 405  | 0,09 | missense_variant | 3 of 6 Predicted as Damaging |
| 101Ad | 19 | 1223126  | STK11 | p.Asp355Asn | G/A |         | 160,3  | 1125 | 0,07 | missense_variant | 2 of 6 Predicted as Damaging |
| 689Ad | 19 | 1223135  | STK11 | p.Asp358Asn | G/A |         | 96,2   | 414  | 0,08 | missense_variant | 3 of 6 Predicted as Damaging |

<sup>1</sup> *In silico* predictions were produced by SIFT, PolyPhen2 HVAR, MutationTaster, FATHMM, FATHMM MKL Coding. Stop-gained mutations produced predictions only by MutationTaster and FATHMM MKL Coding. Note: Stop\_gained mutations produced predictions only by MutationTaster and FATHMM MKL Coding, and framehift mutations by none.

Abbreviations: Alt, altered nucleotide; Chr, chromosome; COSMIC, the Catalogue of Somatic Mutations in Cancer; HGVS, Human Genome Variation Society; Ref, reference nucleotide; VAF, variant allele frequency.

## Methylation changes examined solely in adenomas with low-grade dysplasia

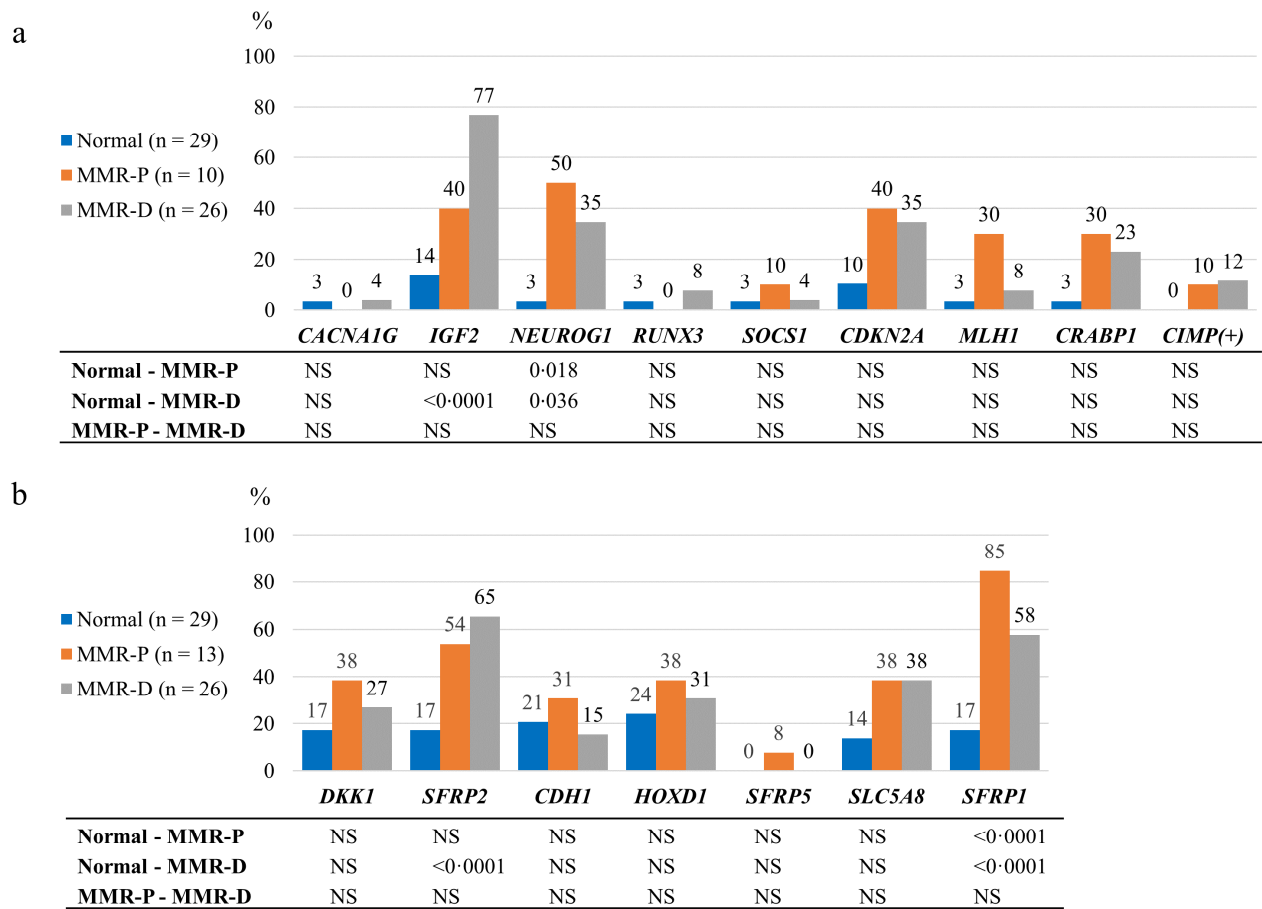

**Supplementary Figure S1.** Frequencies of methylated genes in normal colon, and MMR-P and MMR-D adenomas with low-grade dysplasia. a. Hypermethylation frequencies of CIMP marker genes and CIMP positive phenotype. b. Hypermethylation frequencies of candidate tumor suppressor genes. Bonferroni corrected two-sided *p* values are presented for pairwise comparisons. Abbreviations: MMR-D, MMR deficient; MMR-P, MMR proficient; NS, non-significant.

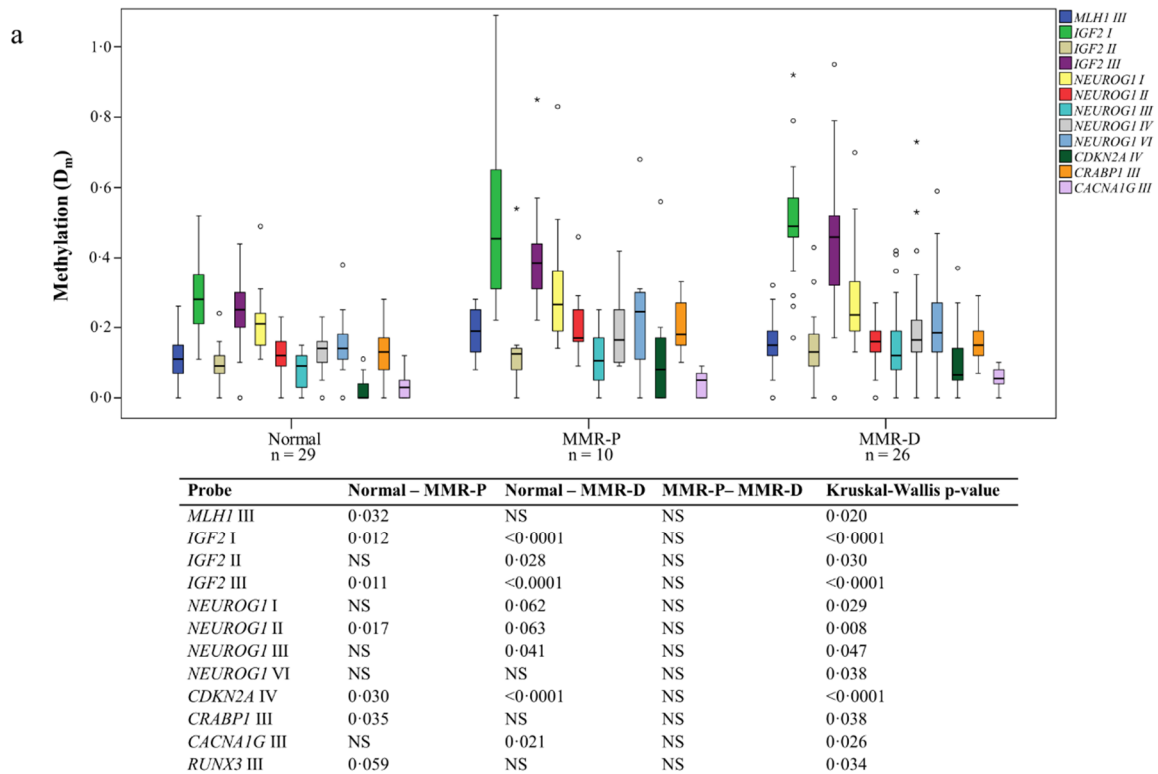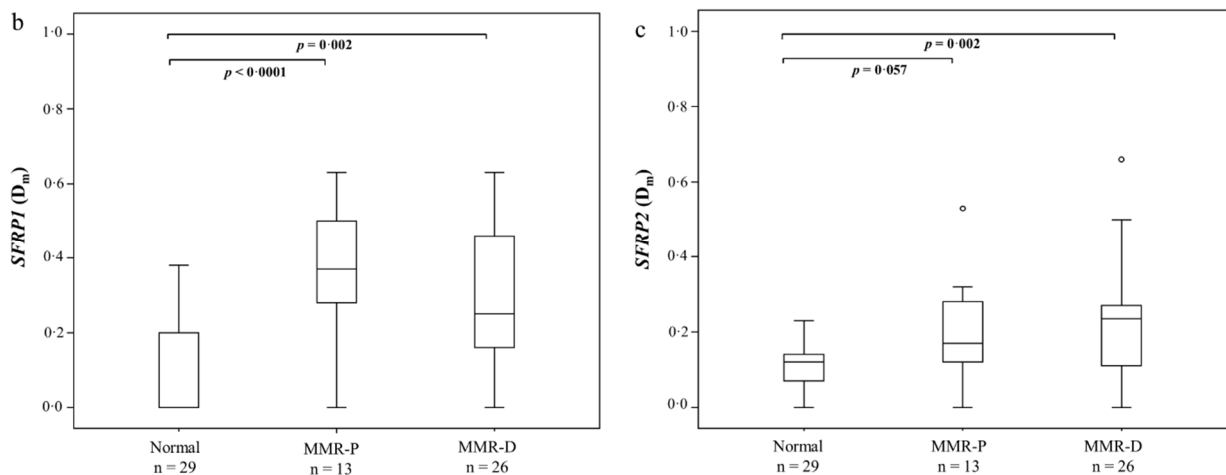

**Supplementary Figure S2.** Comparison of average degrees of methylation between normal colon, and MMR-P and MMR-D adenomas with low-grade dysplasia. **a.** The CIMP probes showing statistical significance ( $p < 0.05$ ) with Kruskal-Wallis test. **b.** Average degree of methylation of *SFRP1*. **c.** Average degree of methylation of *SFRP2*. Bonferroni corrected two-sided  $p$  values less than 0.10 are presented for the pairwise comparisons. The upper and lower edges of the boxes are the 75<sup>th</sup> and 25<sup>th</sup> percentiles, the horizontal line inside the box denotes the median, the whiskers indicate the highest and lowest values, and the asterisks and open circles stand for outliers. Abbreviations:  $D_m$ , methylation dosage; MMR-D, MMR deficient; MMR-P, MMR proficient.

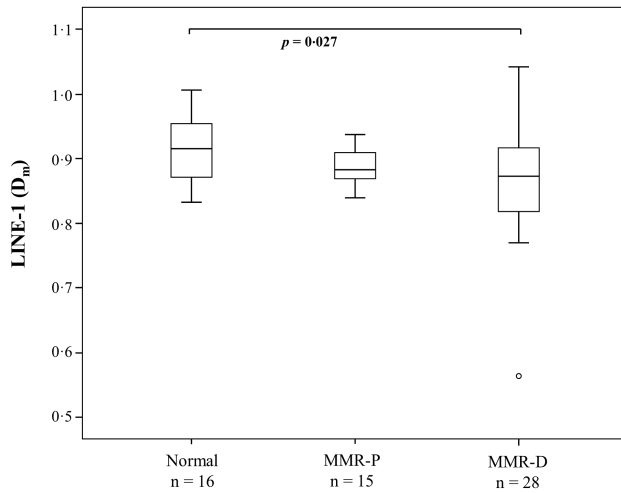

**Supplementary Figure S3.** Average degree of methylation of LINE-1 in normal colon, and MMR-D and MMR-P adenomas with low-grade dysplasia. Bonferroni corrected two-sided  $p$  values less than 0.10 are presented in the figure. The upper and lower edges of the boxes are the 75th and 25th percentiles, the horizontal line inside the box denotes the median, the whiskers indicate the highest and lowest values, and the asterisks and open circles stand for outliers. Abbreviations: D<sub>m</sub>, methylation dosage; MMR-D, MMR deficient; MMR-P, MMR proficient.
